# Supplementary material for: Development of a Drip-Biofilter Microbial Fuel Cell System with Air-Gap Isolation for Enhanced Wastewater Treatment and Power Generation
Source: Research Square preprint supplement (doi:10.21203/rs.3.rs-7298179/v1), 2025-08-12
Supplement: Supplementary file 1 [file e793b3563df75d31246fcef1.docx]

**Tables**

Table 1. Power generation performance of different MFCs stack systems

| Group＊ | MFC unit | Voltage (V) | Volume power density (mW/m3) | References |
| --- | --- | --- | --- | --- |
| DB-TAC-MFCs | 3 | 1.14 | 5218.3 | This study |
| AS-TAC-MFC | 3 | 0.8 | 2436 | This study |
| AC-stacked-MFCs 1 | 20 | 0.7 | - | (*25*) |
| AC-stacked-MFCs 2 | 40 | 0.55 | - | (*25*) |
| Miniaturized ceramic-based MFC | 560 | - | 6800 | (*26*) |

＊ DB-TAC-MFCs: drip biofilter-based tubular air-cathode microbial fuel cells system; AS-TAC-MFCs: anode-sharing TAC-MFCs; AC-stacked-MFCs 1: air-cathode-stacked-MFCs 1.
